1 **Early-life environment programs reproductive strategies through epigenetic regulation of *SRD5A1***

2 Ben Bar-Sadeh<sup>1</sup>, Or Eden<sup>1</sup>, Lilach Pnueli<sup>1</sup>, Kurshida Begum<sup>2</sup>, Gregory Leeman<sup>3</sup>, Richard D. Emes<sup>4</sup>,

3 Reinhard Stöger<sup>3</sup>, Gillian R. Bentley<sup>2</sup>, Philippa Melamed<sup>1</sup>

4

5 <sup>1</sup>Faculty of Biology, Technion-Israel Institute of Technology, Haifa 32000 ISRAEL

6 <sup>2</sup>Department of Anthropology, Durham University, Durham, DH1 3LE UK

7 <sup>3</sup>School of Biological Sciences, University of Nottingham, Nottingham, LE12 5RD UK

8 <sup>4</sup>School of Veterinary Medicine and Sciences, University of Nottingham, Nottingham, LE12 5RD UK.

9

10 Corresponding Author: Philippa Melamed, Faculty of Biology, Technion-Israel Institute of Technology,

11 Haifa 32000 ISRAEL. Tel: 972-4-8293760; [philippa@tx.technion.ac.il](mailto:philippa@tx.technion.ac.il)

12

13

14 **Abstract**

15 Reproductive function and duration of the reproductive life span are phenotypically plastic and  
16 programmed in response to the early-life environment. Such adaptive responses are described and  
17 rationalized in life history theory in the context of resource availability, but the molecular mechanisms  
18 responsible have remained enigmatic. In this study, we hypothesized that epigenetic modifications  
19 underlie adaptive reproductive strategies, and found distinct methylation patterns in buccal DNA of  
20 Bangladeshi women who grew up in Bangladesh or the UK. The later pubertal onset and lower ovarian  
21 reserve associated with Bangladeshi childhood was seen to correlate with more numerous childhood  
22 infections, so we adopted a mouse model of pre-pubertal colitis to mimic these conditions. These mice  
23 have a similarly-altered reproductive phenotype, which enabled us to determine its mechanistic basis.  
24 Several genes encoding proteins with known functions in follicle recruitment were differentially  
25 expressed in the mice ovaries, and were also differentially methylated in the women's buccal DNA. One  
26 of these, *SRD5A1* which encodes the steroidogenic enzyme 5 $\alpha$  reductase-1, was down-regulated in  
27 the mice ovaries and hyper methylated at the same putative transcriptional enhancer as in the women's  
28 DNA; the levels of methylation correlating with gene expression levels. *Srd5a1* expression was down-  
29 regulated also in the hypothalamus where 5 $\alpha$  reductase-1 catalyzes production of neurosteroids that  
30 regulate gonadotropin releasing hormone (GnRH). Chemical inhibition of this enzyme affected both  
31 GnRH synthesis and release, and resulted in delayed pubertal onset *in vivo*. The activity of 5 $\alpha$  reductase-  
32 1 in hypothalamus and ovary and the sensitivity of *SRD5A1* to epigenetic regulation attest to its role in  
33 directing long-term physiological strategies in response to environmental conditions. In the reproductive  
34 axis, this includes timing of pubertal onset, adult reproductive function and duration of the reproductive  
35 lifespan.

36  
37 **Keywords:** reproduction; epigenetics; endocrine; ovary; hypothalamus; GnRH; migrants; women; mice;  
38 *SRD5A1*; 5 $\alpha$  reductase-1; neurosteroids

39

40

## 41 **Introduction**

42 Reproductive function is plastic, responding and adapting to environmental signals with changes in age  
43 of sexual maturation, hormone levels, rates of ovulation and fertility, as well as length of a woman's  
44 reproductive lifespan<sup>1,2</sup>. The adult reproductive phenotype is particularly sensitive to the early life  
45 environment and is largely programmed by mid-childhood. This was evident in studies on Bangladeshi  
46 migrants, in which we found that women who spent their childhood in Bangladesh, at least until aged 8  
47 years, experienced later pubertal onset, earlier menopause and had a lower ovarian reserve than  
48 Bangladeshi women who grew up in the UK<sup>3-6</sup>. Children who migrated at a younger age, or second-  
49 generation Bangladeshis in the UK, had similar reproductive phenotypes to their European ethnic  
50 neighbors, while women who were adults at migration maintained the "Bangladeshi childhood"  
51 reproductive phenotype even after many years in the UK. Such adaptive strategies might enhance the  
52 likelihood of reproductive success over the life course, and often involve trade-offs between growth and  
53 reproduction, as described and rationalized in life history theory<sup>7-10</sup>. Although this theory explains  
54 phenotypic diversity and plasticity in the context of resource availability<sup>11-13</sup>, a mechanistic  
55 understanding at the molecular level, detailing how an altered reproductive strategy can be  
56 implemented and maintained throughout the life course, is completely lacking.

57 Epigenetic modification provides a means of sensing the environment and translating diverse signals  
58 into altered patterns of gene expression, which can have a profound and long-term effect on the  
59 phenotype. The epigenome undergoes considerable modification during various stages of development  
60 and, as is becoming clear, plays a role in the maturation of the reproductive axis at puberty as well as  
61 adult reproductive function<sup>14-16</sup>. We therefore hypothesized that the early-life environment programs  
62 reproductive strategies through epigenetic-driven mechanisms.

63 Multiple hurdles exist in studying the epigenetic and mechanistic bases to human reproductive function  
64 and plasticity, not least of which is the inaccessibility of hypothalamic-pituitary-gonadal (HPG) tissues in  
65 healthy subjects<sup>1</sup>. In this study, we first examined buccal tissues from Bangladeshi women to look for  
66 changes in DNA methylation associated with their childhood environment. In order to address the

67 functional relevance of these findings, we then employed a mouse model of early-life challenges  
68 comparable to those experienced in Bangladesh. The women's distinct reproductive phenotype is  
69 associated specifically with higher disease load in Bangladesh<sup>3,4</sup>, where individuals are exposed to  
70 recurrent immune challenge in a country prone to seasonal floods, outbreaks of disease and relatively  
71 poor healthcare<sup>17</sup>. The Bangladeshi women in our studies are, however, well-nourished, rarely perform  
72 manual work and are relatively affluent. To match these conditions, we adopted a mouse model of pre-  
73 pubertal (equivalent of human age ~6.5-9 y) mild colitis to expose the mice to immunological challenges.  
74 The treatment leads to a similarly altered reproductive phenotype and permits access to the functional  
75 reproductive tissues for gene expression and epigenetic analysis. This approach, combining all the  
76 advantages of an experimental mouse model with observations and proxy tissue DNA analysis from  
77 distinct groups of women, has revealed a pivotal role for the steroidogenic enzyme, 5 $\alpha$  reductase-1 and  
78 its epigenetic regulation in programming adult reproductive strategies, affecting the timing of pubertal  
79 onset, adult reproductive function and duration of the reproductive lifespan.

80

## 81 **Results**

### 82 *Differential methylation patterns in Bangladeshi women who grew up in Bangladesh or in the UK*

83 Methylation analysis of buccal DNA revealed that adult Bangladeshi women (aged  $28.1 \pm 5.0$  y) living in  
84 London had distinct methylation signatures, depending on whether they had experienced childhood in  
85 Bangladesh (n=15) or the UK (n=13). Illumina-Methylation Epic array data revealed 17,004 CpG sites  
86 with a mean methylation difference >20%, most of which (14,509) mapped to "open sea" regions of the  
87 genome; a smaller number (2,423) were associated with "shores" and "shelves" and 72 mapped within  
88 CpG islands. Methylation of CpG islands harboring promoters is a strong indicator of suppressed gene  
89 expression, and we first investigated genes with known functions in fertility. We identified, and  
90 confirmed by targeted bisulfite sequencing (Fig S1A), elevated methylation levels in CpG islands  
91 associated with *FZD1* and *RUNX3*, both of which encode proteins that regulate ovarian

92 folliculogenesis<sup>18,19</sup>, and also *RASAL3*, which controls a magnitude of inflammatory responses<sup>20</sup> and has  
93 been linked specifically to inflammatory bowel disease<sup>21</sup>. Pathway analysis revealed that genes with  
94 differentially methylated CpGs were significantly enriched in the Hippo (FDR 6.99E-12) and PI3K-Akt  
95 (FDR 2.83E-07) signaling pathways (Fig S1B-D), both of which play central roles in regulating follicle  
96 recruitment and growth<sup>22,23</sup>.

97

98 *The altered reproductive phenotype of a mouse model of early life colitis is similar to that of the women*  
99 *who experienced childhood in Bangladesh*

100 In order to determine whether these epigenetic modifications occur also in the reproductive tissues and  
101 play a functional role in the altered phenotype, we set up an appropriate animal model. We induced  
102 temporal colitis in newly-weaned female mice (22-23 d old: approximately equivalent to 6-6.5 y in  
103 human age<sup>24</sup>), by administration of dextran sodium sulfate (DSS) in the drinking water for 7 days, in  
104 order to mimic early-life immune challenges experienced by girls in Bangladesh<sup>3,4</sup>. The mice stopped  
105 gaining weight during the latter part of the treatment and blood was evident in the feces, but they  
106 quickly recovered (Fig 1A). Notably, however, the DSS-treated mice had delayed onset of puberty by an  
107 average of 6 days (Fig 1B), corresponding to just over 1.5 y in human lifespan<sup>24</sup>. This was evident only in  
108 the treated mice and, as in the women, was not inherited transgenerationally<sup>3</sup>, with puberty in the  
109 female off-spring occurring at a similar age to that in off-spring of littermate controls (Fig 1C). Levels of  
110 circulating anti-Müllerian hormone (AMH) comprise a clinical marker for size of the ovarian reserve and,  
111 as in women who had experienced Bangladeshi childhood<sup>5</sup>, were significantly lower in the DSS-treated  
112 mice than the controls (Fig 1D). Thus, the reproductive phenotype of the mouse model mirrors that of  
113 the women who were exposed to the early-life immune challenges of childhood in Bangladesh, enabling  
114 us to study the underlying mechanisms of this adaptive response.

115

116 *The mouse model ovaries have altered follicle numbers and gene expression in pathways regulating*  
117 *follicle growth and recruitment*

118 Given that these findings pointed to altered ovarian function, we examined histological sections of the  
119 mouse ovaries. Follicle counts showed fewer primary and antral follicles in the DSS-treated mice than in  
120 the controls, and there were significantly more atretic follicles (Fig 2A-E). This concurs with the lower  
121 AMH levels, and reveals an altered reproductive trajectory involving increased rates of oocyte depletion  
122 from the limited ovarian pool.

123 In order to determine the pathways responsible for the altered ovarian activity, we carried out RNA-seq  
124 transcriptome analysis of ovaries from the treated mice and their litter-mate controls. Both coding and  
125 non-coding RNAs were found to be differentially expressed: 92 were upregulated, while 13 were down-  
126 regulated ( $P_{adj} < 0.05$ ; Fig 2F). Pathway analysis (Fig S2) of the differentially-expressed genes ( $P < 0.05$ )  
127 revealed enrichment specifically for oocyte-meiosis (FDR 1.9-E02) and, as in the women's differentially  
128 methylated DNA, also for the Hippo signaling pathway (FDR 4.3-E01). Also similar to the women's  
129 distinct methylation patterns, genes in the PI3K-AKT signaling pathway that stimulates the recruitment  
130 of ovarian follicles<sup>23</sup> were enriched, with up-regulation of several activators of the pathway, while the  
131 expression of PTEN which represses this pathway was reduced (Fig 2G).

132

133 *SRD5A1 is hypermethylated in women and mice following early-life immune challenge*

134 Among the most significantly differentially expressed genes in the mouse ovaries, three were associated  
135 specifically with differentially methylated regions in the women's DNA. *PKIB* and *GIGYF2* (both encode  
136 proteins that activate AKT; Fig 2G) were less methylated in the women who experienced childhood in  
137 Bangladesh and their expression was up-regulated in the ovaries from the DSS-treated mice, while  
138 *SRD5A1* was more methylated in these women and its expression down-regulated in the mouse model  
139 (Fig 3A-C).

140 *SRD5A1* encodes the steroidogenic enzyme, 5 $\alpha$  reductase-1, which converts testosterone to  
141 dihydrotestosterone (DHT). DHT inhibits follicle activation through decreasing cyclin D2 expression and  
142 inducing cell cycle arrest<sup>25</sup>, and via activation of PTEN which represses PI3/AKT signaling<sup>26</sup>. DHT also  
143 activates progesterone production<sup>27</sup>. Thus the drop in 5 $\alpha$  reductase1 levels would not only facilitate  
144 oocyte exit from the primordial follicle pool, in accordance with the ovarian histology, but would also  
145 lower progesterone production, as seen in the women who spent their childhood in Bangladesh<sup>3</sup>.

146 We therefore examined whether methylation of *Srd5a1* was also affected in our mouse model. The  
147 *Srd5a1* promoter was reported to be hypermethylated in the prefrontal cortex of mice in response to  
148 psychological stress<sup>28</sup>, but it was completely unmethylated in ovaries of both DSS and control groups of  
149 mice (Fig S3A). Only ~570 bp separate the start of the mouse *Srd5a1* gene and its neighboring gene,  
150 *Nsun2*, while in the human genome, these divergent genes are just ~50 bp apart, which points to  
151 additional key gene-specific *cis* regulatory regions beyond the proximal promoter. We therefore  
152 examined the mouse genomic region, homologous to that differentially methylated in the human  
153 samples, which is located in both genomes at the start of the first intron. DNA bisulfite conversion and  
154 deep-sequencing revealed that this region was significantly more methylated in the ovaries of the DSS-  
155 treated group than in the controls (Fig 3D). This intronic region carries all of the marks of a  
156 transcriptional enhancer<sup>29</sup> (Fig S3B), supporting the impact of this methylation on gene expression  
157 levels, which was observed also in the strong correlation between levels of mRNA expression and CpG  
158 methylation at the locus (Fig 3E). Furthermore, this putative enhancer region contains a SNP, rs494958,  
159 which was reported to be associated with age at natural menopause, as well as two other significant  
160 SNPs in high linkage disequilibrium with this trait<sup>30</sup>.

161

162 *The up-regulation of Srd5a1 by estradiol is blunted by anti-inflammatory cytokines*

163 To determine the pathways leading to a reduction in *Srd5a1* expression as a result of the early-life  
164 adversity, we first examined how its levels normally change with sexual maturation. Comparison of  
165 *Srd5a1* mRNA levels in ovaries from sexually immature and mature mice showed that they increased

176 around 6-fold over this time (Fig 4A). To determine the mechanisms involved, we exposed ovarian KK-1  
177 mouse granulosa cells to various steroids, which revealed a stimulatory effect of estradiol (E2), while  
178 neither DHT, progesterone nor dexamethasone (synthetic cortisol) had any notable effects (Fig 4B, S4).  
179 This suggests that the rise in *Srd5a1* expression at the time of puberty is due to the increase in E2 levels.  
180 We then verified whether *Srd5a1* expression is affected adversely by the anti-inflammatory cytokines,  
181 IL4, IL-10 and IL-13, which are elevated in the general stress response. Although these cytokines alone  
182 did not reduce basal *Srd5a1* levels (Fig 4C), when given together with E2, both IL-10 and IL-13 blocked  
183 the E2-stimulatory effect on this gene without affecting its up-regulation of *Cyp19a1* (Fig 4D). Thus, early  
184 life adversity leading to an increase in IL-10 and/or IL-13, can cause a reduction in 5 $\alpha$  reductase-1 levels  
185 by dampening the stimulatory effect of E2, explaining the particularly significant impact of this response  
186 at early stages of pubertal development.

177

### 178 *5 $\alpha$ reductase-1 regulates the central control of reproduction and pubertal timing*

179 5 $\alpha$  reductase-1 is widely expressed and we considered that its altered expression in non-ovarian tissues  
180 might play additional roles in mediating the distinct reproductive phenotype. We therefore measured  
181 *Srd5a1* expression in the hypothalamus and the prefrontal cortex of the brain, and in the pituitary of the  
182 mouse model. *Srd5a1* mRNA levels were reduced in the hypothalamus of the treated mice, but not in  
183 the prefrontal cortex or the pituitary (Fig 5A). Using additional mice, separation of the hypothalamus  
184 into distinct regions confirmed the reduced expression of *Srd5a1* specifically in the pre-optic area (Fig  
185 5B), which contains most of the neurons that control reproduction, suggesting a possible role in the  
186 timing of pubertal onset. This connection was supported by the fact that in second generation mice,  
187 both age of pubertal onset (Fig 1C) and levels of *Srd5a1* mRNA in the ovaries and hypothalami (Fig 5C)  
188 were similar to those of controls.

189 The drop in *Srd5a1* expression in the hypothalamus led us to examine the expression levels of *Gnrh* and  
190 other genes that encode factors regulating the reproductive axis. The mRNA levels of *Gnrh* were



191 significantly lower in the DSS-treated mice than in their litter-mate controls, as were those of *Kiss1*;  
192 notably *Tac2* mRNA levels were elevated, while those of *Kiss1r* and *Esr1* were unaltered (Fig 5D). The  
193 expression of *Fkbp5*, which is highly sensitive to glucocorticoids, was not different in these mice (Fig 5D),  
194 indicating that the mice were not suffering chronic stress.

195 To establish whether 5 $\alpha$  reductase-1 activity regulates expression of these genes in GnRH neurons, we  
196 exposed the GT1-7 GnRH neuronal cell line to the inhibitor, dutasteride. As in the DSS-treated mice,  
197 both *Gnrh* and *Kiss1* mRNA levels were repressed by the drop in 5 $\alpha$  reductase-1 activity, while the mRNA  
198 levels of *Kiss1r* and *Fkbp5* were unaffected (Fig 5E). Given previous reports that some neurosteroids  
199 catalysed by this enzyme activate the stimulatory GABA-A receptor and can augment GABA effects on  
200 GnRH release at puberty<sup>31-33</sup>, we also examined the effects of 5 $\alpha$  reductase-1 inhibition on GnRH  
201 release. Dutasteride repressed GnRH release from these cells and completely blocked the stimulatory  
202 effects of a GABA-A agonist, muscimol; however, levels were restored to those of controls by addition of  
203 the neurosteroid, allopregnanolone (Fig 7F).

204 Having established the impact of early-life adversity on hypothalamic expression of *Srd5a1*, and the  
205 effects of 5 $\alpha$  reductase-1 on regulation of GnRH synthesis and secretion, we went on to demonstrate  
206 the role of this enzyme in determining pubertal onset *in vivo*. Young female mice were treated with  
207 dutasteride daily starting soon after weaning. The treatment delayed their first vaginal opening (FVO) by  
208 3-4 days compared to the sham-treated litter-mate controls (Fig 7G), which corresponds to an estimated  
209 ~1 y in human lifetime<sup>24</sup>. Thus the reduced expression of this enzyme due to down-regulation of *Srd5a1*  
210 expression following early-life adversity appears to play a role in the delay in pubertal onset.

211

## 212 **Discussion**

213 Our study demonstrates that down-regulation of *SRD5A1* plays a pivotal role in shaping adult  
214 reproductive function in response to experiences during pre-pubertal development. Having found that  
215 this gene was differentially-methylated in buccal DNA of Bangladeshi women according to their

216 childhood environment, we have been able to confirm, in an appropriate mouse model, its altered  
217 expression in the functional reproductive tissues and its function in the distinct reproductive phenotype  
218 that follows this early-life adversity. Through manipulations *in vitro* and *in vivo*, we have demonstrated  
219 the role of 5 $\alpha$  reductase-1 in determining pubertal timing through regulation of GnRH synthesis and  
220 secretion. Moreover, the modified expression in the mouse model of *Srd5a1* and other genes in the  
221 pathways to ovarian follicle recruitment, explains the differing rates of oocyte depletion and disparate  
222 ages at menopause in the Bangladeshi women. We have thus uncovered a key role for this enzyme in  
223 determining the reproductive trajectory throughout the adult lifespan, from puberty to menopause,  
224 which is established by epigenetic programming during childhood development.

225 Given that *Srd5a1* mRNA levels increase across puberty and in response to E2, the immediate pre-  
226 pubertal period evidently comprises a particularly sensitive time to any signals that diminish this up-  
227 regulation. Such signals include the anti-inflammatory cytokines that we examined, and likely  
228 encompass additional signals arising from other forms of physiological or psychological stress, given that  
229 activity of this enzyme was seen to be decreased following various stressors and this was most  
230 pronounced when the stress was experienced at a young age (e.g.<sup>34–38</sup>). These reports support a role for  
231 epigenetic modification of *SRD5A1* during childhood in determining additional aspects of the adult  
232 phenotype, particularly relating to the stress axis.

233 Apart from its role in pubertal timing, reduced expression of 5 $\alpha$  reductase-1 in the hypothalamus  
234 undoubtedly has consequences for other endocrine axes, especially those controlling growth and the  
235 stress response which are also regulated by neurosteroids catalysed by this enzyme<sup>38–40</sup>. In the face of  
236 adversity and limited resources, altered epigenetic regulation of *SRD5A1* in the hypothalamic control  
237 center, would allow differential regulation of these major endocrine axes to mediate the adaptive  
238 response to changing environmental conditions which underlie the trade-offs between growth,  
239 reproduction and homeostasis described through life history theory.

240 Such reprogramming of these axes might well be beneficial for the individual, but the altered  
241 reproductive phenotype presents health consequences, given that timing and duration of the

242 reproductive lifespan dictate risks for steroid- and age-related disease. The epigenetic basis of plasticity  
243 that we describe here explains some of the diversity in reproductive characteristics and how they are  
244 shaped by early childhood environment, while also opening up the possibility that these characteristics  
245 might be susceptible to manipulation to mitigate health issues across the lifespan.

246

## 247 **Methods**

### 248 ***Human methylation analysis***

249 British-Bangladeshi women (20-35 y), were recruited in London through community contacts using  
250 snowballing techniques. The first group comprised women who were born in Bangladesh and moved to  
251 the UK when aged over 16 y. The second group comprised women who were second-generation British-  
252 Bangladeshis, born in the UK to Bangladeshi migrant parents. Protocols for human data collection were  
253 approved by the Ethical Committee of the Department of Anthropology, Durham University. Women  
254 gave informed consent to participate in the study, and the data were anonymized at source.

255 Buccal swabs were collected with iSWAB (Mawi DNA Technologies) and genomic DNA isolated using the  
256 DNeasy Blood & Tissue Kit (Qiagen). Genome-wide DNA methylation data acquisition was carried out on  
257 the Infinium MethylationEPIC BeadChip platform (Illumina) and performed by Tepnel Pharma Services,  
258 UK using 'Bangladeshi childhood' (n=16) and 'UK childhood' (n=13) DNA samples, which passed the  
259 quality control checks. Multidimensional scaling (MDS) plots indicated that no significant batch effects  
260 were skewing our MethylationEPIC BeadChip data sets. The data were processed with the  
261 Bioconductor/minfi package. CpG probes associated with known SNPs were removed, as were those  
262 with a detection probability of <0.01. Probes on both X and Y chromosomes were retained. Methylation  
263 beta values (0-1) were normalized by SWAN. Dmpfinder/minfi was applied to determine probes with  
264 significantly differentially methylation levels between the 'Bangladeshi-childhood' and the 'UK-  
265 childhood' groups. FDR was set at <0.05. The pathway analysis utilized NIPA, a tool that performs  
266 enrichment tests by hypergeometric statistics (<https://github.com/ADAC-UoN/NIPA/>).

267 For validation of the array data, targeted bisulfite sequencing was conducted on a subset of the samples  
268 used to generate the MethylationEPIC BeadChip data (chosen on the basis of their DNA quality and  
269 concentration) via amplicon sequencing of 10 CpG sites using the MiSeq system (Barts and the London  
270 School of Medicine and Dentistry, GenomeCentre). The interrogated CpGs were cg25470148  
271 (chr1:25257931) lower-strand, *RUNX3*; cg16696646 (chr17:19861616), lower-strand *AKAP10*;  
272 cg26916966 (chr17:40274524), upper-strand, *KAT2A*; cg07357279 (chr17:43318735), upper-strand,  
273 *FMNL1*; cg01062942 (chr19:15568935), upper-strand, *RASAL3*; cg08470875 (chr2:26401718), upper-  
274 strand, *FAM59B*; cg08700190 (chr5:6636046), upper-strand, *SRD5A1*; cg08198075 (chr6:123033536),  
275 upper-strand, *PKIB*; cg12914114 (chr6:170687002), lower-strand, *FAM120B*; cg01480180  
276 (chr7:90896329), lower-strand, *FZD1*. For each interrogated genomic region, >100 sequencing reads  
277 were obtained. Primers are given in Table S1.

## 278 **Mice**

279 All animals were held and handled humanely, after protocol approval, and in accordance with IACUC  
280 guidelines. For DSS-treatments, upon weaning, female mice from each litter were divided randomly into  
281 two groups to provide littermate controls for all experiments. After ~2 d recovery, the mice were ear-  
282 marked and weighed, and one group received 3 % dextran sodium sulfate (DSS: 35-50 kDa, MP  
283 Biochemicals) in the drinking water for 7 d. The DSS water was changed every 2-3 d and the mice were  
284 weighed each day for at least 16 d. All mice were observed daily for signs of pubertal onset, as  
285 determined by FVO. In order to assess the impact of this early life exposure on the second generation, a  
286 single male was housed with the DSS-treated and the littermate control female mice.

287 For harvest of brain tissue, the brains were removed and whole hypothalamus or prefrontal cortex  
288 isolated into 1 ml TRIzol for RNA extraction. For isolation of specific regions (preoptic area, arcuate  
289 nucleus or cerebellum), brains were transferred into a brain matrix (RWD-800-00149-00) for coronal  
290 sectioning following isolation of each region from the relevant section, as determined using Allen Brain  
291 Atlas. All tissues were collected from females in estrous, verified by cytological smears. Blood was  
292 collected by cardiac puncture at the time of sacrifice, and circulating AMH levels were measured by

293 ELISA (Ansh labs, Webster, Texas) according to the manufacturer's protocol, after dilution of all samples  
294 x20.

295 For the administration of dutasteride *in vivo*, after weaning, female mice from each litter were marked,  
296 weighed and divided to two groups. A transparent plastic separator (kindly given by Madaf Plazit  
297 Packaging) was inserted into each cage, with one mouse in each half. Dutasteride (SML1221, Sigma) was  
298 dissolved in oleic acid (O1383, Sigma) at 15 mg/ml, and added to a ~60 mg piece of enriched diet pellet  
299 (D12451i, Research Diets). Immediately after separation, each mouse received the dutasteride-treated  
300 diet (~13 µg/g BW) or a similar amount of vehicle-treated diet for controls. The pellet was consumed  
301 fully within a few minutes, and the separator was then removed. The treatment was repeated daily, and  
302 mice were weighed and observed daily for signs of FVO.

### 303 ***Histology and follicle counts***

304 Ovaries were harvested from the mice at ~60 d and were fixed with 4 % paraformaldehyde for 4 h  
305 before transferral to 70 % ethanol. Paraffin embedding, sectioning (4 µm), and hematoxylin and eosin  
306 (H&E) staining were carried out at the Biomedical Core Facilities at the Rappaport Faculty of Medicine,  
307 Technion-Israel Institute of Technology. Identification of follicle stage (using CaseViewer software) and  
308 counting were performed (as in<sup>41,42</sup>), while blind to the treatment group. In short, every fifth section per  
309 ovary was analyzed, and the follicular stage was determined by size and morphological characteristics:  
310 primary follicles containing a single layer of cuboidal granulosa cells; secondary follicles showing more  
311 than one layer of granulosa cells but no antrum, and antral follicles containing an antral space. Atretic  
312 follicles were identified based on the presence of *zona pellucida* remnants, stained bright pink.  
313 Secondary and antral follicles were counted only if a nucleus was present, and the atretic follicles, which  
314 vary considerably in size, were counted every 8<sup>th</sup> stained section, to avoid counting the same follicle  
315 twice. The "follicle counts" presented comprise the number of follicles at each of these stages counted  
316 in each ovary using this approach.

### 317 ***Quantitative PCR, transcriptome and methylation analysis***

318 RNA was isolated using TRIzol, DNase I-digested and cleaned using R1014 RNA Clean & Concentrator-5  
319 kit (Zymo Research), cDNA synthesized using the qScript Flex cDNA kit (95049 Quanta) using oligo dT,  
320 and real-time quantitative PCR (qPCR) was carried out using the PerfeCTa SYBR Green FastMix (Quanta),  
321 both as previously reported<sup>43</sup>, using primers listed in Table S2. Amplicon levels were quantified using  
322 standard curves and normalized to levels of *Rplp0*.

323 For transcriptome analysis, RNA was extracted from the mice ovaries and purified as above, and  
324 sequenced by CEL-seq, using Illumina HiSeq 2500 at the Technion Genome Center (as in<sup>44</sup>). FastQC was  
325 used for quality control and the reads were mapped by TopHat algorithm to mm10 genome assembly.  
326 HTSeq-count was used to count the reads, and the normalization of raw counts and differential  
327 expression were calculated using DESeq2 in R platform, with *Padj* using Benjamini and Hochberg  
328 correction for false discovery. Pathway analysis was performed using the Database for Annotation,  
329 Visualization and Integrated Discovery (DAVID).

330 DNA was extracted from the mouse tissues using TRIZOL, and the genomic DNA cleaned with the Quick-  
331 DNA Miniprep Plus Kit (D4068; Zymo), before bisulfite conversion using the EZ-DNA Methylation-Gold  
332 Kit (D5005 Zymo), and two rounds of PCR-amplification (nested, with outer and inner primers: Table S2)  
333 using Red Load Taq Master (Larova). After purification of the amplicons (PCR purification kit; Qiagen)  
334 and cloning into pGEM-T-easy, inserts from 7-8 randomly selected clones were sequenced and analyzed  
335 as previously<sup>45</sup>. Subsequently, the region in the first intron homologous to that differentially methylated  
336 in the human samples, was amplified and cleaned as above. Additional rounds of PCR were then  
337 performed using KAPA HiFi HotStart Ready mix (Roche), initially with primers containing the adaptors  
338 (Universal adaptors; Illumina) and subsequently another 8-12 PCR cycles with the specific primers  
339 (Illumina Nextera XT index kit); samples were cleaned with PCR purification kit (Qiagen) between each  
340 stage. These libraries, after addition of 50% Phi-X, were then deep-sequenced by 150 bp paired-end  
341 sequencing on Mi-seq (Illumina), at the Technion Genome Center.

342 ***Cell culture***

343 The KK-1 granulosa cell line was cultured as reported<sup>46</sup>, maintained at 37 °C with 5 % CO<sub>2</sub> at 30-80 %  
344 confluency, passaging 2-3 times a week. The cells were exposed either to 1-100 nM of the steroids  
345 (Sigma) for 24 h, or to anti-inflammatory cytokines: IL-4, IL-10 or IL-13 (1-100 ng/ml for 24h), alone or  
346 before addition of E2. Alternatively, the GT1-7 mouse hypothalamic GnRH neuronal cell line was  
347 cultured with high glucose DMEM containing 10 % FBS, 1 % penicillin-streptomycin, sodium pyruvate  
348 and sodium bicarbonate, maintained at 37 °C with 5 % CO<sub>2</sub> at 50-90 % confluency, passaging 1-2 times a  
349 week. For mRNA measurements, the cells were cultured in charcoal-stripped FBS medium for 24 h  
350 before some were exposed to dutasteride (5 µM) for 24 h. Cells were then harvested for RNA extraction  
351 and qPCR analysis as before.

352 For analysis of GnRH release, cells (in 6-well plates) were washed twice in medium without FBS,  
353 incubated in the same medium, and some exposed to dutasteride (10 µM). After 30 min, P4 (2 µM) was  
354 added for 5 h, and then muscimol (100 µM) or/and AP were added for 1 h. The medium was collected  
355 into 1.5 ml tubes, centrifuged for 2 min at 3000 g and kept at -80 °C for measurement of GnRH in the  
356 supernatant by ELISA (Phoenix Pharmaceuticals, catalog # EK-040-02CE), according to the  
357 manufacturer's protocol.

### 358 ***Statistical analysis***

359 All data are from multiple biological repeats (n-value) which were assayed individually. Results are  
360 shown as box plots (whiskers show minimum and maximum values, boxes represent 25–75% data  
361 ranges, horizontal lines within boxes indicate the median values), individual values, or as mean ± SEM  
362 values. Statistical analysis for parametric data was using a Student's *t*-test (two-tailed), and differences  
363 considered significant at  $p \leq 0.05$ , or alternatively One-way analysis of variance (ANOVA), followed by  
364 the Tukey-Kramer or Bonferroni *t*-test for multiple comparisons. Methylation analysis (% methylation)  
365 utilized Mann-Whitney non-parametric *t*-test.

366 ***Data Availability*** Data are available at NCBI's Gene Expression Omnibus (GEO), GSE133355 (human DNA  
367 methylation data) and GSE133633 (mouse RNA-seq data).



368

369 **Acknowledgements:** This research was supported by Biotechnology and Biological Science Research  
370 Council (BBSRC)/Economic and Social Research Council (ESRC) grant ES/N000471/1 (to GB, RS and PM).  
371 We thank Kamila Derecka for technical support.

372

## 373 **References**

- 374 1. Bar-Sadeh, B. *et al.* Unravelling the role of epigenetics in reproductive adaptations to early-life  
375 environment. *Nature Reviews Endocrinology* **16**, 519–533 (2020).
- 376 2. Vitzthum, V. J. The ecology and evolutionary endocrinology of reproduction in the human female.  
377 *Am. J. Phys. Anthropol.* **140**, 95–136 (2009).
- 378 3. Núñez-De La Mora, A., Chatterton, R. T., Choudhury, O. A., Napolitano, D. A. & Bentley, G. R.  
379 Childhood conditions influence adult progesterone levels. *PLoS Med.* **4**, 0813–0821 (2007).
- 380 4. Murphy, L. *et al.* Life course effects on age at menopause among Bangladeshi sedentees and  
381 migrants to the UK. *Am. J. Hum. Biol.* **25**, 83–93 (2013).
- 382 5. Begum, K. *et al.* Ethnicity or environment: effects of migration on ovarian reserve among  
383 Bangladeshi women in the United Kingdom. *Fertil. Steril.* **105**, 744–754.e1 (2016).
- 384 6. Magid, K., Chatterton, R. T., Ahamed, F. U. & Bentley, G. R. Childhood ecology influences salivary  
385 testosterone, pubertal age and stature of Bangladeshi UK migrant men. *Nat. Ecol. Evol.* **2**, 1146–  
386 1154 (2018).
- 387 7. Gadgil, M. & Bossert, W. H. Life Historical Consequences of Natural Selection. *Am. Nat.* **104**, 1–24  
388 (1970).
- 389 8. Stearns, S. C. The evolution of life histories. *Oxford Univ. Press* (1992).
- 390 9. Roff, D. A. *Life history evolution*. (Sinauer Associates, 2002).
- 391 10. Jasienska, G., Bribiescas, R. G., Furberg, A.-S., Helle, S. & Núñez-de la Mora, A. Human  
392 reproduction and health: an evolutionary perspective. *Lancet (London, England)* **390**, 510–520  
393 (2017).
- 394 11. Rickard, I. J. *et al.* Food availability at birth limited reproductive success in historical humans.  
395 *Ecology* **91**, 3515–3525 (2010).
- 396 12. Barrett, L., Dunbar, R. & Lummaa, V. *Life-History Theory, Reproduction and Longevity in Humans*.  
397 (Oxford University Press, 2012).
- 398 13. Ellison, P. T. Endocrinology, energetics, and human life history: A synthetic model. *Horm. Behav.*  
399 **91**, 97–106 (2017).
- 400 14. Shalev, D. & Melamed, P. The role of the hypothalamus and pituitary epigenomes in central  
401 activation of the reproductive axis at puberty. *Mol. Cell. Endocrinol.*
- 402 15. Melamed, P. *et al.* Multifaceted Targeting of the Chromatin Mediates Gonadotropin-Releasing  
403 Hormone Effects on Gene Expression in the Gonadotrope. *Front. Endocrinol. (Lausanne)*. **9**, 58  
404 (2018).
- 405 16. Melamed, P. Histone deacetylases and repression of the gonadotropin genes. *Trends in*  
406 *Endocrinology and Metabolism* **19**, 25–31 (2008).
- 407 17. Siddique AK, Baqui AH, Eusof A, Z. K. 1988 Floods in Bangladesh: pattern of illness and causes of  
408 death. *J Diarrhoeal Dis Res* **9**, 310–314 (1991).
- 409 18. Hernandez Gifford, J. A. The role of WNT signaling in adult ovarian folliculogenesis. *Reproduction*  
410 **150**, E137-R148 (2015).
- 411 19. Ojima, F. *et al.* Runx3 regulates folliculogenesis and steroidogenesis in granulosa cells of  
412 immature mice. *Cell Tissue Res.* **375**, 743–754 (2019).



- 413 20. Muro, R., Nitta, T., Kitajima, M., Okada, T. & Suzuki, H. Rasal3-mediated T cell survival is essential  
414 for inflammatory responses. *Biochem. Biophys. Res. Commun.* **496**, 25–30 (2018).
- 415 21. Huang, C. *et al.* Characterization of Genetic Loci That Affect Susceptibility to Inflammatory Bowel  
416 Diseases in African Americans. *Gastroenterology* **149**, 1575–1586 (2015).
- 417 22. Kawamura, K. *et al.* Hippo signaling disruption and Akt stimulation of ovarian follicles for  
418 infertility treatment. *Proc. Natl. Acad. Sci. U. S. A.* **110**, 17474–9 (2013).
- 419 23. Hsueh, A. J. W., Kawamura, K., Cheng, Y. & Fauser, B. C. J. M. Intraovarian control of early  
420 folliculogenesis. *Endocr. Rev.* **36**, 1–24 (2015).
- 421 24. Dutta, S. & Sengupta, P. Men and mice: Relating their ages. *Life Sciences* **152**, 244–248 (2016).
- 422 25. Pradeep, P. K., Li, X., Peegel, H. & Menon, K. M. J. Dihydrotestosterone inhibits granulosa cell  
423 proliferation by decreasing the cyclin D2 mRNA expression and cell cycle arrest at G1 phase.  
424 *Endocrinology* **143**, 2930–5 (2002).
- 425 26. Chen, M.-J. *et al.* The effect of androgens on ovarian follicle maturation: Dihydrotestosterone  
426 suppress FSH-stimulated granulosa cell proliferation by upregulating PPAR $\gamma$ -dependent PTEN  
427 expression. *Sci. Rep.* **5**, 18319 (2015).
- 428 27. Hasegawa, T. *et al.* A regulatory role of androgen in ovarian steroidogenesis by rat granulosa  
429 cells. *J. Steroid Biochem. Mol. Biol.* **172**, 160–165 (2017).
- 430 28. Araki, R., Nishida, S., Hiraki, Y., Matsumoto, K. & Yabe, T. DNA methylation of the GC box in the  
431 promoter region mediates isolation rearing-induced suppression of *srd5a1* transcription in the  
432 prefrontal cortex. *Neurosci. Lett.* **606**, 135–139 (2015).
- 433 29. Melamed, P., Yosefzon, Y., Rudnizky, S. & Pnueli, L. Transcriptional enhancers: Transcription,  
434 function and flexibility. *Transcription* **7**, (2016).
- 435 30. He, C. *et al.* A large-scale candidate gene association study of age at menarche and age at natural  
436 menopause. *Hum. Genet.* **128**, 515–527 (2010).
- 437 31. Han, S.-K., Abraham, I. M. & Herbison, A. E. Effect of GABA on GnRH neurons switches from  
438 depolarization to hyperpolarization at puberty in the female mouse. *Endocrinology* **143**, 1459–66  
439 (2002).
- 440 32. Herbison, A. E. & Moenter, S. M. Depolarising and Hyperpolarising Actions of GABAA Receptor  
441 Activation on Gonadotrophin-Releasing Hormone Neurones: Towards an Emerging Consensus.  
442 *Journal of Neuroendocrinology* **23**, 557–569 (2011).
- 443 33. Watanabe, M., Fukuda, A. & Nabekura, J. The role of GABA in the regulation of GnRH neurons.  
444 *Front. Neurosci.* **8**, 387 (2014).
- 445 34. Dong, E. *et al.* Brain 5 $\alpha$ -dihydroprogesterone and allopregnanolone synthesis in a mouse  
446 model of protracted social isolation. *Proc. Natl. Acad. Sci. U. S. A.* **98**, 2849–54 (2001).
- 447 35. Agís-Balboa, R. C. *et al.* Down-regulation of neurosteroid biosynthesis in corticolimbic circuits  
448 mediates social isolation-induced behavior in mice. *Proc. Natl. Acad. Sci. U. S. A.* **104**, 18736–  
449 18741 (2007).
- 450 36. Yehuda, R., Bierer, L. M., Andrew, R., Schmeidler, J. & Seckl, J. R. Enduring effects of severe  
451 developmental adversity, including nutritional deprivation, on cortisol metabolism in aging  
452 Holocaust survivors. *J. Psychiatr. Res.* **43**, 877–883 (2009).
- 453 37. Agis-Balboa, R. C., Guidotti, A. & Pinna, G. 5 $\alpha$ -reductase type i expression is downregulated in the  
454 prefrontal cortex/Brodmann's area 9 (BA9) of depressed patients. *Psychopharmacology (Berl).*  
455 **231**, 3569–3580 (2014).
- 456 38. Brunton, P. J. Programming the Brain and Behaviour by Early-Life Stress: A Focus on Neuroactive  
457 Steroids. *Journal of Neuroendocrinology* **27**, 468–480 (2015).
- 458 39. Camille Melón, L. & Maguire, J. GABAergic regulation of the HPA and HPG axes and the impact of  
459 stress on reproductive function. *Journal of Steroid Biochemistry and Molecular Biology* **160**, 196–  
460 203 (2016).
- 461 40. Veldhuis, J. D. *et al.* Aromatase and 5 $\alpha$ -reductase inhibition during an exogenous testosterone  
462 clamp unveils selective sex steroid modulation of somatostatin and growth hormone  
463 secretagogue actions in healthy older men. *J. Clin. Endocrinol. Metab.* **94**, 973–981 (2009).
- 464 41. Myers, M., Britt, K. L., Wreford, N. G. M., Ebling, F. J. P. & Kerr, J. B. Methods for quantifying  
465 follicular numbers within the mouse ovary. *Reproduction* **127**, 569–580 (2004).

- 466 42. Bristol-Gould, S. *et al.* Postnatal regulation of germ cells by activin: the establishment of the  
467 initial follicle pool. *Dev Biol* **298**, 132–148 (2006).
- 468 43. Haj, M. *et al.* Mitogen- and stress-activated protein kinase 1 is required for gonadotropin-  
469 releasing hormone-mediated activation of gonadotropin  $\alpha$ -subunit expression. *J. Biol. Chem.* **292**,  
470 20720–20731 (2017).
- 471 44. Feldman, A. *et al.* Sensitivity of pituitary gonadotropes to hyperglycemia leads to epigenetic  
472 aberrations and reduced follicle-stimulating hormone levels. *FASEB J.* **33**, 1020–1032 (2019).
- 473 45. Yosefzon, Y. *et al.* An epigenetic switch repressing Tet1 in gonadotropes activates the  
474 reproductive axis. *Proc. Natl. Acad. Sci. U. S. A.* **114**, 10131–10136 (2017).
- 475 46. Kananen, K. *et al.* Gonadal tumorigenesis in transgenic mice bearing the mouse inhibin  $\alpha$ -subunit  
476 promoter/simian virus T-antigen fusion gene: Characterization of ovarian tumors and  
477 establishment of gonadotropin-responsive granulosa cell lines. *Mol. Endocrinol.* **9**, 616–627  
478 (1995).

479

480

481 **Figures**

482

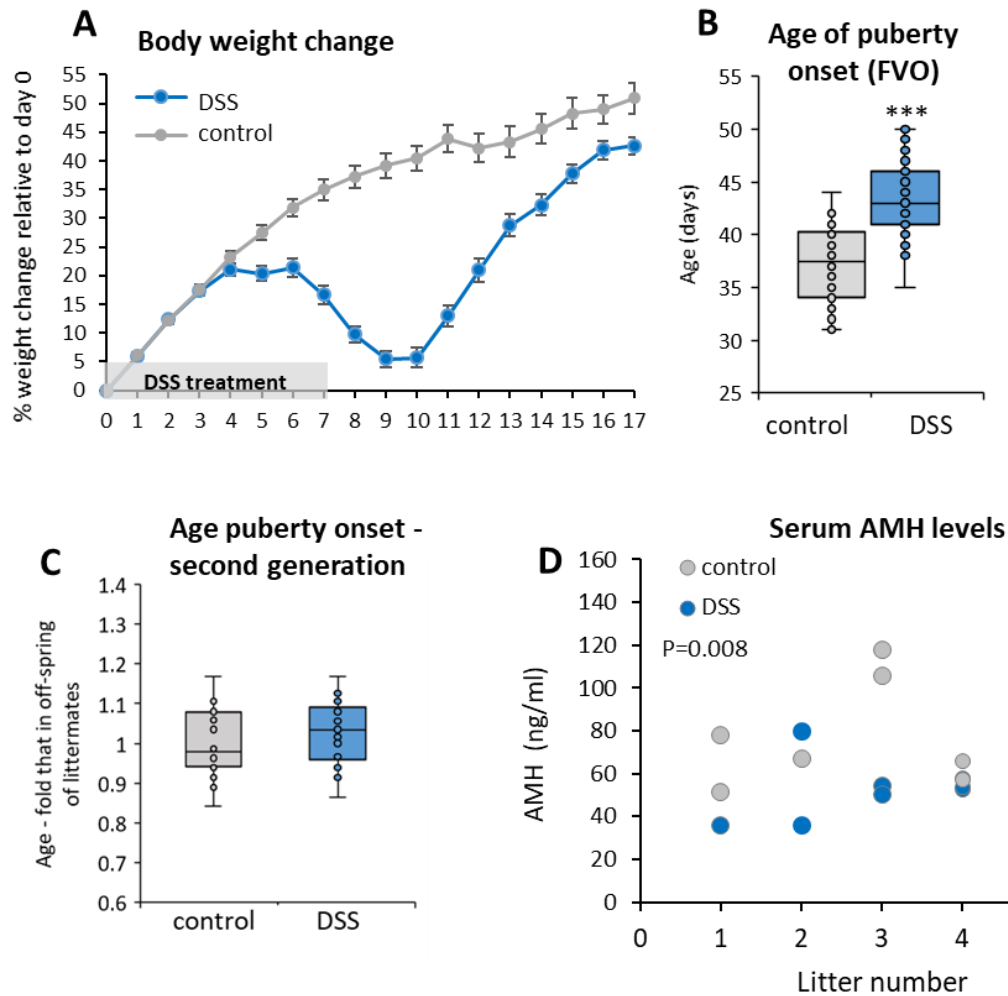

483 **Fig 1:** Reproductive phenotype of the mouse model of early-life colitis is similar to that of the women who  
 484 experienced childhood immunological challenge. (A) Changes in body weight in control (n=48) and DSS-  
 485 treated (n=45) mice, relative to their initial weight. Mean±SEM. (B) Age of first vaginal opening (FVO),  
 486 indicating onset of puberty. \*\*\*P<0.001; n=44, 48. (C) Age of FVO in second generation, relative to that  
 487 in off-spring of parent littermate controls. P>0.05; n=20, 30. (D) Circulating AMH (ng/ml) in control and  
 488 DSS-treated mice, shown separately for each of six litters. Mean between groups (control: 88.07 ng/ml  
 489 [n=11] and DSS: 57.06 ng/ml [n=14]: P=0.008).

490

491

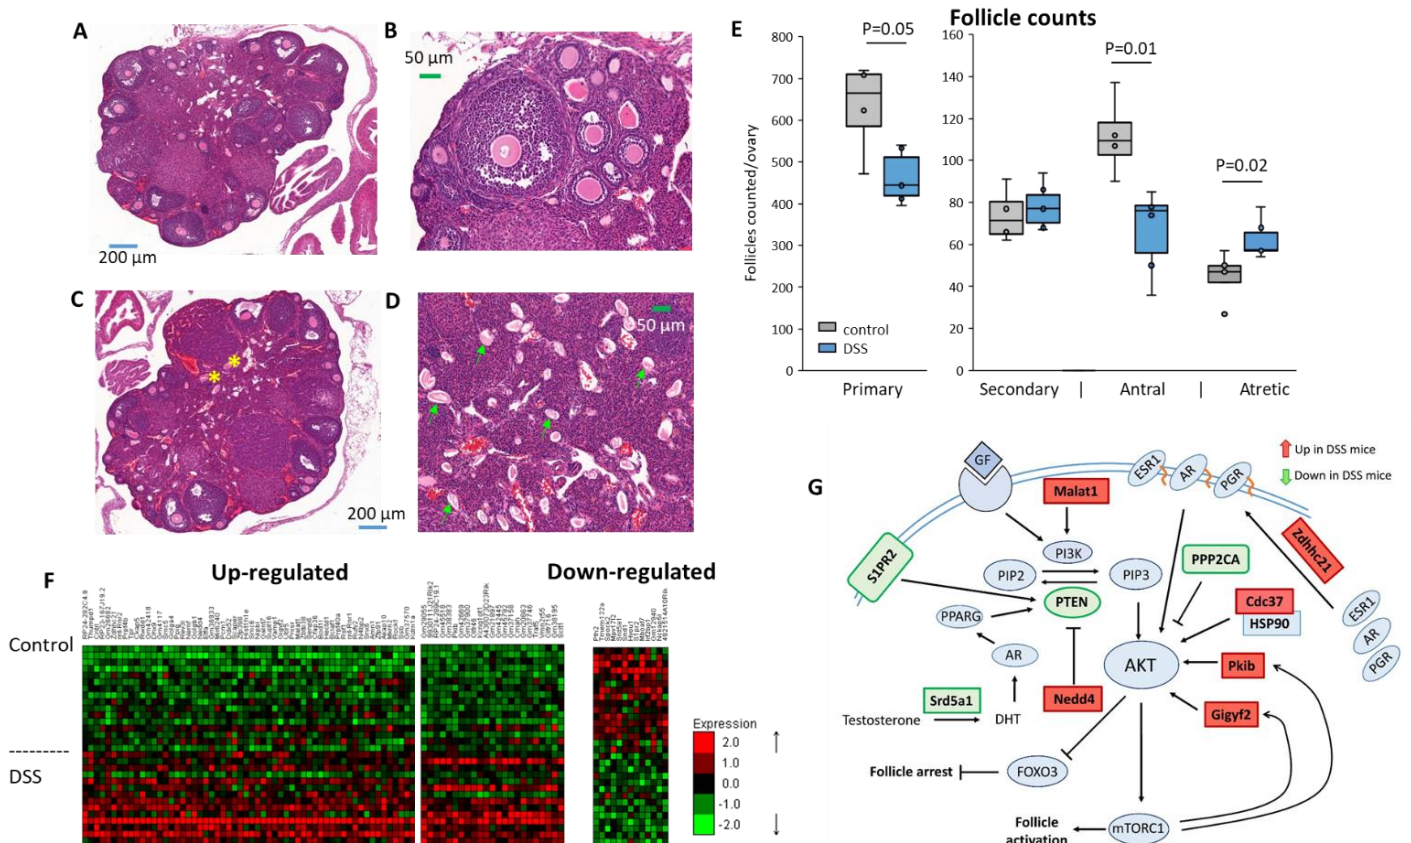

492

493 **Fig 2: The mouse model ovaries exhibit altered follicle numbers and pathways of gene expression**

494 *regulating follicle activation.* (A-D) H&E stained ovarian histological sections from (A,B) control and (C,D)

495 DSS-treated groups. Some atretic follicles (yellow asterisks) and *zona pellucida* remnants (green arrows)

496 are marked. (E) Follicle counts from sections of mice ovaries (n=4, n= 6), compared by t-test. (F) Heat

497 map of differentially expressed ovarian genes (DEGs) at  $P_{adj} < 0.05$  from RNA-seq analysis. Each column

498 represents a gene and each row represents the expression level in one ovary. (G) Signaling pathway to

499 follicle activation, showing some of the DEGs ( $P < 0.05$ ). Red boxes signify up-regulated genes; green

500 boxes signify down-regulated genes.

501

502

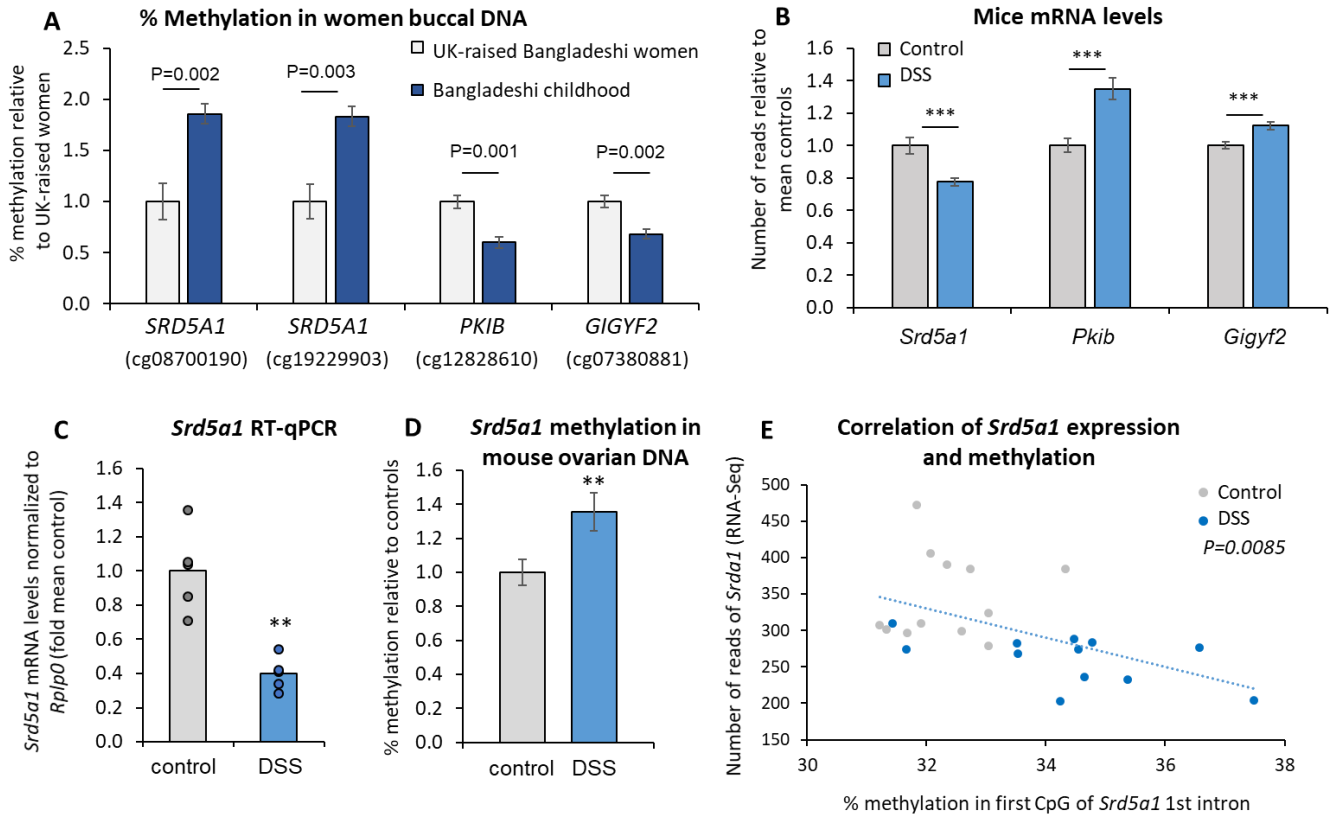

503

504 **Fig 3:** *Srd5a1* is hypermethylated in women and mice following early-life immune challenge. (A) Three  
 505 genes (Illumina EpicMethylation sites) associated with differentially methylated regions in buccal DNA of  
 506 Bangladeshi women who grew up in Bangladesh (n=16) or UK (n=13); mean±SEM. (B) The mRNA levels  
 507 of these genes in control (n=16) and DSS-treated (n=14) mice ovaries from the RNA-seq analysis; \*\*\*:  
 508  $P_{adj}<0.001$ ; mean±SEM. (C) qPCR analysis of the *Srd5a1* mRNA levels (n=5), \*\*:  $P=0.007$ ; showing means  
 509 with individual data points. (D) Levels of CpG methylation in the 5' region of the *Srd5a1* first intron  
 510 (corresponds with first site in Fig 3A: see S3), in control (n=24) and DSS-treated (n=29) mice ovaries,  
 511 mean±SEM shown relative to controls; \*\*:  $P=0.015$  (Mann-Whitney t-test). (E) Correlation between the  
 512 levels of *Srd5a1* mRNA (from RNA-seq analysis) and methylation measured in the same samples;  
 513  $P=0.0085$ .

514

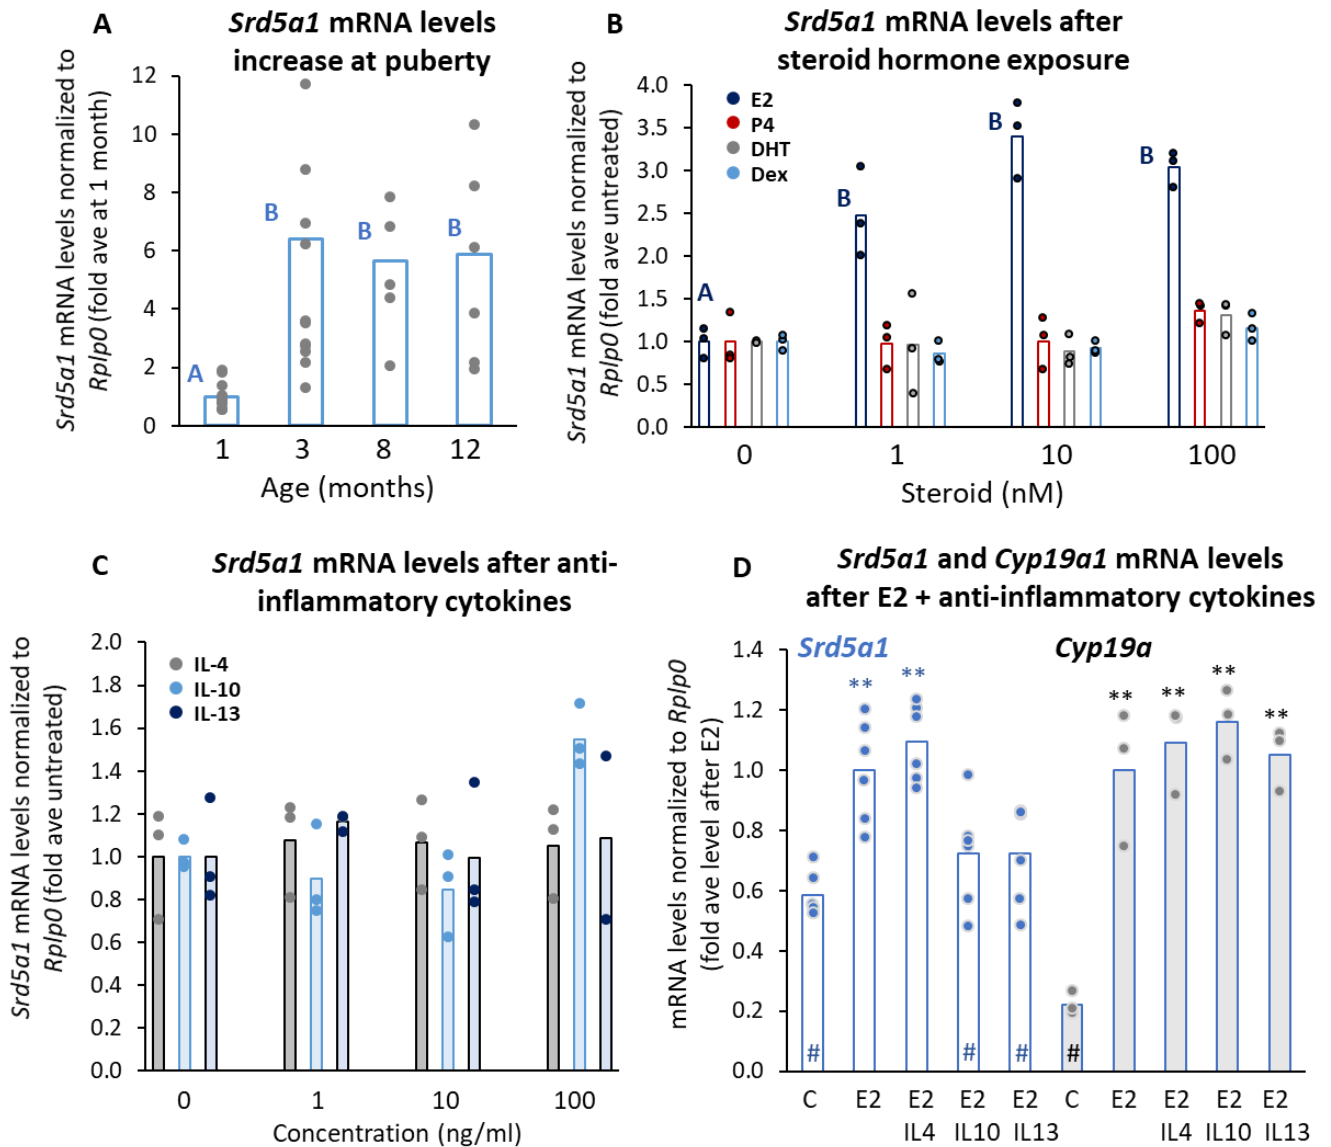

515 **Fig 4:** The up-regulation of *Srd5a1* by estradiol is blunted by anti-inflammatory cytokines. (A) *Srd5a1*  
 516 mRNA levels in ovaries of mice of various ages (n=12, 14, 5 or 6); for groups sharing same letter: p>0.05  
 517 (ANOVA, Tukey-Kramer t-test). (B) *Srd5a1* mRNA levels in KK-1 cells (n=3) after exposure to estradiol  
 518 (E2), progesterone (P4), dihydrotestosterone (DHT) or dexamethasone (Dex). For E2, ANOVA is as in Fig  
 519 4A; otherwise P>0.05 (C) *Srd5a1* mRNA levels after cytokine exposure (n=3). (D) *Srd5a1* (n=6) and  
 520 *Cyp19a* (n=3) mRNA levels after E2 alone (10 nM) or with cytokine (100 ng/ml); \*\*: p<0.02 vs control; #:  
 521 p<0.02 vs E2; where not marked p>0.05. All graphs show mean with individual data points.

522



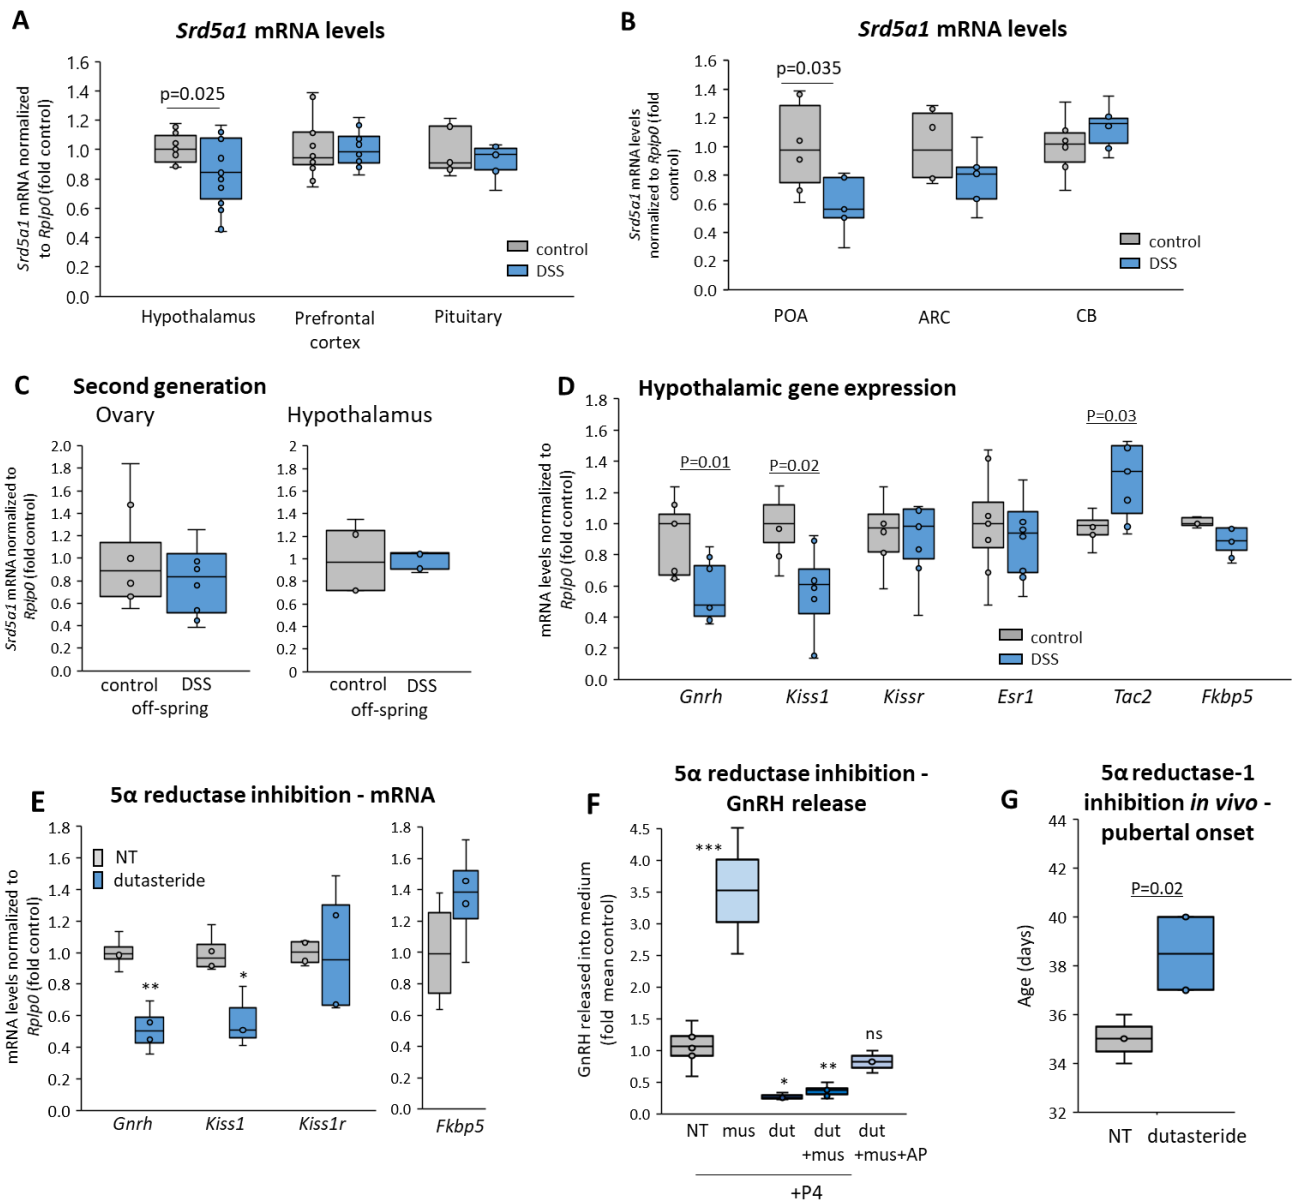

523 **Fig 5:** 5 $\alpha$  reductase-1 regulates the central control of reproduction and pubertal timing. *Srd5a1* mRNA  
 524 levels were measured in (A) hypothalamus (n=14), prefrontal cortex (n=15,14) and pituitary (n=7) of  
 525 control and DSS-treated mice; or (B) preoptic area (POA: n=6, 5) and arcuate nucleus (ARC: n=6, 5) of the  
 526 hypothalamus, and the cerebellum (CB: n= 6). (C) *Srd5a1* mRNA levels in the ovary (n=8) and  
 527 hypothalamus (n=4,5) of female off-spring of DSS-treated mice and their littermate controls. (D) The  
 528 mRNA levels of genes encoding reproductive regulatory factors were measured in the hypothalamus of  
 529 the DSS-treated and control mice, with *Fkbp5* as an indicator for stress. (E,F) The effect of 5 $\alpha$  reductase  
 530 inhibitor, dutasteride in GT1-7 GnRH neuronal cells on (E) gene expression (n=8, 4) and (F) GnRH release,  
 531 in which some cells were also exposed to the GABA $_A$  agonist, muscimol, alone (n=2), with dutasteride  
 532 (n=6) or together with AP (n=3), all in the presence of AP precursor, P4. Significant differences ( $p<0.05$ )  
 533 are shown for comparisons with control mice or untreated cells, otherwise  $P>0.05$ . (G) Age of FVO  
 534 following dutasteride: female mice and their control littermates were given dutasteride (or vehicle) in  
 535 the diet each day after weaning, and checked daily for FVO (n=3, 4).
